1                   **MEF2C is a new regulator of the human articular chondrocyte phenotype**

2

3

4

S. Lazzarano<sup>1</sup> and C.L. Murphy<sup>2</sup>

5

6

7

<sup>1</sup>Friedrich Miescher Laboratory

8

Paul-Ehrlich-Strasse 20

9

72076 Tuebingen

10

Germany

11

<sup>2</sup>Kennedy Institute of Rheumatology

12

University of Oxford

13

Roosevelt Drive

14

Oxford, OX3 7FY

15

United Kingdom

16

17

18

Address correspondence to Professor Chris L. Murphy; Ph +44-(0)1865612644;

19

Email: [chris.murphy@kennedy.ox.ac.uk](mailto:chris.murphy@kennedy.ox.ac.uk)

20

21

Funding: SL was funded through a studentship by the Kennedy Trust for Rheumatology Research.

22

1 MEF2C plays a role in diverse tissues, most notably heart, brain, eyes and developing bones. Here we report for the  
2 first time that MEF2C is present and active in the permanent articular cartilage in humans which lines and protects our  
3 joints throughout life. We show that MEF2C directly targets cartilage master regulator gene SOX9, and SOX9, in turn,  
4 regulates MEF2C in a novel positive feedback loop maintaining high expression levels of both transcription factors,  
5 and consequently stabilising the articular chondrocyte phenotype and helping prevent hypertrophy and subsequent  
6 calcification and vascularisation. We propose that MEF2C and SOX9 may show similar cooperative activity in other  
7 tissues, and across a range of adult murine tissues we found co-expression of both transcription factors in cartilage,  
8 trachea, brain, eyes and heart. Strikingly, all of these tissues are prone to calcification and further study of  
9 MEF2C/SOX9 cooperativity in these organs will be revealing.

## 1 INTRODUCTION

2 Human articular chondrocytes (HACs) are the only cell population present in articular cartilage and they  
3 produce and maintain its extracellular matrix (ECM) in extreme physiological conditions such as high mechanical  
4 stresses and low levels of oxygen (hypoxia) [1-5] [6]. Intriguingly, the transcriptional apparatus that sustains the  
5 expression of the cartilage matrix is induced by hypoxia through HIF-2 $\alpha$  targeting of cartilage master regulator  
6 transcription factor SOX9 [7-9]. Furthermore, it has been possible to identify potentially novel genes important for  
7 chondrocyte function by their up-regulation in hypoxia and down-regulation upon de-differentiation [7]). By this  
8 means we identified Myocyte enhancing factor 2 isoform C (MEF2C) as a potential gene of interest in HACs.

9 Studies have shown MEF2 expression in lymphocytes, smooth muscle, neural crest, endothelium, and bone  
10 with the highest levels in skeletal muscle and brain where they play a central role in specific cellular genetic  
11 programmes and stress responses [10-17]. The C isoform (MEF2C) of this family of transcription factors has been  
12 found to be crucial for bone development in mice [11]. The inducible Cre/loxP deletion of the *Mef2c* gene (by using a  
13 *Col2a1* gene promoter in a murine model) prevents chondrocyte hypertrophy during the last phases of the  
14 endochondral ossification process (mice carrying a transcriptional repressor fused with the *Mef2c* gene give the same  
15 phenotype). Conversely, the expression of *Mef2c*-VP16 fusion protein in a murine model results in premature  
16 ossification at E 8.5, which gives a phenotype with excessive ossification of the ribs and sternum, bone shortening and  
17 malformation caused by a premature ossification. This function is partially due to MEF2C regulation of type X  
18 collagen (in conjunction with SOX9), an important component of the hypertrophic ECM. Outside of bone  
19 development, the link between MEF2C and ECM biology is less clear, but Lin and colleagues highlighted that  
20 MEF2C-null embryos fail to form endocardial chambers due to inadequate ECM production [14].

21 We present the first evidence for a key role for MEF2C in maintenance of the permanent articular cartilage in  
22 humans. In contrast to the growth plate, HACs resist hypertrophy and subsequent calcification and vascularisation  
23 partly through maintenance of SOX9 expression [18]. In the present study we uncover a new positive regulatory loop  
24 involving MEF2C and SOX9 which crucially maintains high levels of SOX9 thus helping to stabilise the HAC  
25 phenotype, and enable the articular cartilage to resist calcification. In addition to articular cartilage we show MEF2C  
26 and SOX9 co-expression in brain, eyes, trachea and heart where we propose similar co-operative activity may occur.

- 1 Possible implications for this in these calcification-susceptible tissues are discussed.

## 1 **RESULTS**

### 2 **The MEF2C mRNA and protein are induced by hypoxia in HACs**

3 MEF2C exerts a pivotal role in the control of diverse cell differentiation programmes. However, the expression of the  
4 MEF2C has never before been related with hypoxia in adult human tissues and cells. To understand whether the  
5 expression of MEF2C protein and mRNA both can be increased by hypoxia, HACs have been cultured for 48 hours in  
6 hypoxia (1% O<sub>2</sub>) and normoxia (20% O<sub>2</sub>). In Western Blotting, MEF2C protein is visualised as a multi-band staining  
7 strongly enhanced by hypoxia (Figure 1A) that follows the up-regulation patterns of its mRNA and other chondrocyte-  
8 specific mRNAs SOX9 and COL2A1 (Figure 1B).

9 In order to further characterise the regulation MEF2C gene expression, the kinetics of the MEF2C mRNA up-  
10 regulation in hypoxia was studied. In HACs cultured for 1, 5, 10, 24 hours, MEF2C mRNA shows increased transcript  
11 levels (on average) by 5 hours of hypoxia stimulation, becoming statistically significant by 24 hours (Figure 1C).  
12 These experiments show that cartilage master regulator transcription factor SOX9 is an “early response” gene and  
13 MEF2C shows a similar pattern of expression in response to hypoxia. As expected SOX9 target and key cartilage  
14 matrix gene COL2A1 shows a slower response to hypoxia. Furthermore, hypoxia did not significantly affect MEF2C  
15 mRNA stability as assessed by Actinomycin-D RNA chase assays (Figure 1D) indicating the increased mRNA levels  
16 observed are due to an increased rate of transcription.

17 Immunostaining of freshly isolated healthy articular cartilage from adult human knee joints showed a predominately  
18 nuclear localisation of MEF2C protein similarly to HIF-2 $\alpha$  and SOX9 (Figure 2 A,B). Across a range of adult murine  
19 tissues (RNA from 6 mice was pooled together), gene expression of both *Mef2c* and *Sox9* was investigated, and  
20 significant co-expression was observed in articular cartilage, trachea, brain, eyes and to a lesser extent heart (Figure  
21 2C).

### 22 **Regulation of MEF2C expression in HACs**

23 We next investigated the role of HIF-2 $\alpha$ , and its main target in HACs, SOX9, on MEF2C gene expression. Following  
24 siRNA-mediated silencing of HIF-2 $\alpha$  (encoded by the EPAS1 gene) or SOX9, HACs were cultured for two days at  
25 20% and 1% O<sub>2</sub>. Interestingly, silencing of each individual transcription factor caused a decrease in MEF2C

1 expression at both gene and protein levels (HIF-2 $\alpha$ , Figure 3 A-B, SOX9, Figure 3 C,D). The depletion of SOX9  
2 seemed to have a stronger effect on MEF2C levels (Figure 3 C,D). In contrast to HIF-2 $\alpha$ , HIF-1 $\alpha$  depletion had no  
3 impact on MEF2C expression levels (supplementary Figure 1 A).

#### 4 **MEF2C protein is required for SOX9 gene expression**

5 The role of the MEF2C in HACs is unknown. In order to uncover this function MEF2C was depleted by transfection  
6 of siRNA in HACs (11 donors) which were then cultured for two days in 20% and 1% O<sub>2</sub>. SOX9 expression was  
7 dramatically impacted by MEF2C depletion (Figure 4 A,B); as was cartilage matrix gene and SOX9 target, COL2A1  
8 (Figure 4A) in both normoxic and hypoxic conditions. The silencing of MEF2C in HACs has no appreciable effect on  
9 HIF-2 $\alpha$  protein levels in hypoxia (Figure 4C). MEF2C silencing resulted in the down-regulation of another  
10 transcription factor - DLX5 (supplementary figure 2). The distal-less-homebox 5 is involved in the murine cranio-  
11 facial development along with MEF2C and has been shown to be a hypoxia inducible gene in HACs [17]. However,  
12 DLX5 silencing did not alter SOX9 expression (supplementary figure 3).

#### 13 **MEF2C is directly involved in the transcriptional activation of SOX9**

14 Having established that SOX9 is an early response gene during the HAC response to hypoxia (Figure 1C), we sought  
15 to investigate whether MEF2C transcription factor is required for the activation of SOX9 transcription. To this end we  
16 performed time course experiments in HACs exposed to hypoxia where MEF2C expression was first silenced. MEF2C  
17 depletion abolished hypoxic induction of SOX9 at mRNA and protein levels (Figure 5, A,C).

18 In order to understand the mechanism behind the regulation of SOX9 gene expression mediated by MEF2C, we next  
19 investigated whether MEF2C can affect SOX9 mRNA stability. After transfection with specific siRNA against  
20 MEF2C, cells were cultured for 48 hours in 1% O<sub>2</sub> before treatment with Actinomycin-D and harvested at 1h, 2h, 3h,  
21 and 4h. MEF2C depletion had no effect on SOX9 mRNA stability (Figure 5 D). Collectively these data strongly  
22 suggest MEF2C is (directly or indirectly) activating transcription of SOX9 mRNA.

23 The four MEF2 family members (A, B, C, D) have a high homology in the amino-terminal domain that regulates DNA  
24 binding and the communal minimal consensus sequence of the MEF2 transcription factor is 5'-CT(A/t)(a/t)AAATAG-  
25 3', in tissues including skeletal muscle, cardiac muscle and brain (Andres, Cervera, & Mahdavi, 1995). We used the

1 open-source software JASPAR (<http://jaspar.genereg.net>) for identifying potential binding sequences within SOX9  
2 gene itself, as well as a 5kb upstream region (chromosome 17q24.3, the region tested was 7 kb long). As a result, we  
3 obtained a list of possible sites, which contained the 5'-CT(A/t)(a/t)AAATAG-3' sequence. However, none of the  
4 putative sites indicated by the software turned out to be conserved between species when analysed with rVISTA  
5 software (<http://rvista.dcode.org>). Conservation of binding sites across different species could be an important  
6 functional indication of the involvement of that sequence into the regulation of a target gene. We have to also consider  
7 that the control of gene expression could be dramatically different among tissues/organs or different species  
8 (Wasserman & Sandelin, 2004).

9 Finally, we tested whether MEF2C directly binds the SOX9 gene using a Chromatin Immunoprecipitation assay  
10 (ChIP). An antibody against MEF2 previously used to study the MEF2A-C genetic network (Kalsotra et al., 2014),  
11 was used to isolate putative binding site sequences within the SOX9 gene and 5kb upstream region (chromosome  
12 17q24.3). Our experiments show an enrichment of specific binding on the sequence situated between -4,412 bp and -  
13 4,400 bp from SOX9 gene (Figure 5E).

14

15

## 1 **DISCUSSION**

2           In the present study using human tissue we identify an important new role for MEF2C in the permanent  
3 articular cartilage lining our joints. SOX9 is essential for cartilage formation and function [19] and mutations in this  
4 gene cause severe skeletal defects [20]. One of the key factors maintaining the permanent articular chondrocyte  
5 phenotype, and preventing calcification is maintenance of sufficiently high levels of SOX9 [18]. Here we show for the  
6 first time that transcription factor MEF2C promotes SOX9 expression in human articular chondrocytes by directly  
7 targeting this cartilage master-regulator gene. SOX9 in turn positively regulates MEF2C expression in a positive  
8 feedback loop, which helps maintain high expression of both transcription factors in the permanent articular cartilage  
9 (Figure 6). We propose similar MEF2C/SOX9 co-operative function occurs in other tissues, namely heart, trachea,  
10 brain and eyes.

11           Articular chondrocytes maintain their function throughout life by retaining a stable phenotype that does not  
12 undergo hypertrophy and resists calcification and vascularisation. The articular phenotype is thus distinguished from  
13 the chondrocytes in the growth plate, which proliferate and undergo hypertrophy and apoptosis followed by  
14 calcification, vascularisation and bone formation. A major unresolved question in cartilage biology is what maintains  
15 the permanent articular cartilage throughout the lifespan of the organism. Maintenance of SOX9 levels seems key as  
16 this transcription factor not only regulates cartilage matrix production [7], it also acts as an important negative  
17 regulator of cartilage calcification, vascularization and endochondral ossification [18]. We previously identified  
18 hypoxia as a positive regulator of the HAC phenotype specifically through upregulation of SOX9 via binding of  
19 transcription factor HIF-2 $\alpha$  [8]. Here we identify MEF2C as a new regulator of SOX9 in HACs. We found that  
20 MEF2C binds to a 4kb upstream site from the SOX9 proximal promoter. MEF2C expression levels were in turn  
21 positively regulated by SOX9 and it remains to be seen whether this regulation is also through direct binding. The  
22 positive feedback loop maintaining levels of both MEF2C and SOX9 suggests MEF2C may have additional important  
23 roles in HACs (other than directly regulating SOX9 levels). This will be a fruitful area of future research.

24           Interestingly, the role of MEF2C in the developing skeleton, where it positively regulates chondrocyte  
25 hypertrophy in the growth plate, [21] appears very different from that in the permanent cartilage, which resists  
26 hypertrophy and calcification throughout life. This highlights the fact that specific adaptations have occurred in the



1 permanent cartilage which maintain the articular phenotype, as opposed to the growth plate where chondrocytes  
2 terminally differentiate, undergo apoptosis and are replaced by bone. Here we show that MEF2C is a critical  
3 component of this adaption in articular cartilage through its positive regulatory loop with SOX9. Interestingly in  
4 osteoarthritis - the most common joint disease - articular chondrocytes can show an altered phenotype which  
5 recapitulates some events seen in developing bone such as cellular hypertrophy, with subsequent vascularization and  
6 focal calcification [22]. Therefore an important area for further investigation is the possible role of MEF2C (and  
7 changes in its expression level) in development of joint diseases such as osteoarthritis.

8         In addition to cartilage, across a range of murine tissues we found co-expression of Mef2c and Sox9  
9 specifically in brain, trachea, eyes and heart. Like cartilage, these tissues can undergo calcification and it will be most  
10 interesting to further investigate Mef2c/Sox9 co-operative function in these tissues. Sox9 is critical for heart valve  
11 formation and reduced Sox9 function has been shown to lead to heart valve calcification – a problem of real clinical  
12 significance [23]. Intriguingly, Mef2C has also been show to regulate ECM production and organization in developing  
13 heart valves through direct targeting of cartilage link protein (Ctrl1)[24]. Furthermore, using chromatin  
14 immunoprecipitation assays in embryonic heart tissue the authors showed that both Mef2c and Sox9 bind to the Ctrl1  
15 promoter. In genome-wide array studies we previously showed that MEF2C tightly clustered with CTRL1 (also known  
16 as HAPLN1) and other established cartilage matrix genes (and SOX9 targets) COL2A1, AGC and COL27A1 [7]. Thus  
17 there are striking parallels in the regulatory mechanisms between heart valves and cartilage, and further work is needed  
18 to unearth the role of MEF2C/SOX9 co-operative function in the pathophysiology of these tissues.

19         Krishnan et al show that HIF-1 $\alpha$  transcription factor drives the expression of MEF2C in the heart [25].  
20 However, we have found that MEF2C expression is specifically HIF-2 $\alpha$  dependent in adult HACs. Whether this HIF-  
21 2 $\alpha$  -dependence of MEF2C is cartilage-specific, or is also relevant for other hypoxic tissues that express MEF2C  
22 remains to be seen. It certainly makes sense from a cartilage perspective since we have shown that HIF-2 $\alpha$  is a pro-  
23 anabolic regulator of human cartilage through direct regulation of SOX9 [8, 9]. In the current study it may be that the  
24 HIF-2 $\alpha$  dependence of MEF2C is actually due to HIF-2 $\alpha$  mediated induction of SOX9, rather than direct targeting of  
25 MEF2C by HIFs. It is of interest to note that many of the tissues co-expressing Mef2c and Sox9 are avascular/ or  
26 poorly vascularized – articular cartilage, trachea, heart valves, eyes (retina). It is interesting to speculate that  
27 MEF2C/SOX9 may be playing a role in inhibiting vascular invasion in these tissues. In cartilage SOX9 positively

1 regulates anti-angiogenic factors such as chondromodulin [26] while *Vegfa* was shown to be negatively regulated by  
2 direct binding of Sox9 to the *Vegfa* promoter [18]. In endothelial cell-specific MEF2C-deficient mice it was shown  
3 that MEF2C appears to play an anti-angiogenic role in the retina under stress conditions, and it was suggested that  
4 modulation of MEF2C may prevent pathologic retinal neovascularization [27]. Given Sox9's involvement in  
5 development of this tissue [28], investigation of MEF2C/SOX9 co-operative function in the retina is an exciting area  
6 for future exploration.

7 We conclude that MEF2C is a key new player in promotion and maintenance of the permanent articular  
8 chondrocyte phenotype. MEF2C directly regulates SOX9 expression, and that SOX9, in turn, also regulates MEF2C in  
9 a positive feedback loop which helps maintain high expression levels of both transcription factors, thereby stabilising  
10 the articular chondrocyte phenotype in the permanent cartilage lining our bones. We propose that such MEF2C/SOX9  
11 co-operative function is important in other tissues where they are co-expressed, namely brain, trachea, eyes and heart,  
12 and this represents an exciting opportunity for future research.

## 1 MATERIALS AND METHODS

### 2 Human cartilage tissue

3 Healthy human articular cartilage was obtained from the femoral condyle and tibial plateau from amputations due to  
4 soft tissue sarcomas not involving the joint. Tissue samples were obtained after institutional approval of experiments  
5 (isolation of cells or histological processing), informed written consent, and adherence to Helsinki Guidelines (London  
6 - Riverside Research Ethics Committee, reference number 07/H0706/81). Cartilage was collected on the day of  
7 surgery and cut into small pieces before either digestion to obtain isolated cells or use for histology.

### 8 Human articular chondrocytes (HACs)

9 Donor age ranged from 8 to 62 years old, including both males and females. Cartilage was collected on the day of  
10 surgery and cut into 1-2mm edged cubes. Next, the extracellular matrix proteins were digested using collagenase as  
11 previously described [8]. Cells were seeded at a density of  $8 \times 10^3$  cells/cm<sup>2</sup> and cultured for 5-7 days before passaging.  
12 In the studies performed both primary (P0) and passaged cells (up to P3) were used.

### 13 Time course experiments

14 The day preceding the experiment cells were counted and seeded  $5 \times 10^3$  cells/cm<sup>2</sup> in 3.5 cm dishes. HACs (P1-P3)  
15 were exposed for 1h, 5h, 10h, and 24h to hypoxia using pre-equilibrated medium (10% FBS, DMEM). All the  
16 experiments have been performed in InVIVO<sub>400</sub> Workstation (Ruskinn Technologies).

### 17 mRNA stability assay

18 HACs were seeded  $5 \times 10^3$  cells/cm<sup>2</sup> in 3.5 cm and incubated in hypoxia (1% O<sub>2</sub>) or normoxia (20% O<sub>2</sub>). After 48h  
19 hours the media were switched to media containing 5 µg/mL actinomycin D (Sigma Aldrich Biochemicals) to inhibit  
20 transcription; each hour after that, total RNA was harvested using TRIzol (Invitrogen) following the manufacturer's  
21 protocol. The mRNA was quantify using RT-Q-PCR (standard-curve method) and half-life was calculated via  
22 GraphPad 6.0 software ( *one-decay phase equation*). All experiments in hypoxia were performed in InVIVO<sub>400</sub>  
23 Workstation (Ruskinn Technologies).

### 24 Immunofluorescence staining

1 Following fixation, cryosections or monolayer cultures were blocked with (5% wt/vol BSA, 1% goat serum wt/vol in  
2 0.01% Tween/PBS) for 1hour at room temperature, and then incubated for 16 hours with primary antibody and for  
3 1hour with appropriate secondary antibody. Cells were counterstained with 300 nM 4'-6-diamidino-2-phenylindole  
4 (DAPI) for 5 mins which was contained in the mounting agent ProLong® Antifade (Invitrogen). Antibodies used:  
5 1:1000 SOX9 (Millipore, Ab-5535), 1:100 HIF-2 $\alpha$  (Santa Cruz, sc-13596), 1:200 MEF2C (Cell Signalling  
6 Technologies, D80C110) 1:1000  $\alpha$ -Tubulin (Sigma Aldrich, ab7291). High resolution digital images were acquired  
7 using a Ultraview confocal microscope (PerkinElmer) and merged using Volocity® 3D Image software (  
8 PerkinElmer).

### 9 **Small Interfering RNA Transfection**

10 The day preceding transfection cells were counted and seeded  $5 \times 10^3$  cells/cm<sup>2</sup> in 3.5 cm dishes. The cells were  
11 transfected with siRNA against SOX9 (MWG ACAGAAUUGUGUUAUGUGAdTdT),  
12 MEF2C (s8653, s8654, #143535, Life technologies) HIF1 $\alpha$  (Dharmacon GCAGUAGGAAUUGGAACATT), HIF-2 $\alpha$   
13 (encoded by EPAS1) (Dharmacon CGACAGCUGGAGUAUGAATT) or with negative control sequences (Silencer®  
14 Negative Control #1 using Lipofectamine™ 2000 (Invitrogen). All siRNA were used at a final concentration of 10nM.  
15 After 4 hours of incubation in 20% oxygen, OptiMEM-I was replaced by previously equilibrated medium (10% FBS,  
16 DMEM). Subsequently cells were incubated at the appropriate oxygen tension (1% or 20%) for the duration of the  
17 experiment.

### 18 **RNA Extraction, Reverse Transcription, and Real Time PCR**

19 RNA was isolated using TRIzol (Invitrogen) with an improvement to the single-step RNA isolation method developed  
20 by Chomczynski and Sacchi (Moniot, Biau et al. 2004). The concentration and quality of isolated total RNA were  
21 measured using the Nano-drop (ThermoScientific). For the murine studies total RNA from 15 different mouse tissues  
22 (pooled samples from a total of six male C57 BL/6 mice, aged 12–16 weeks) was obtained from Zyagen (San Diego,  
23 CA). Complementary DNA (cDNA) was generated using Applied Biosystem's High capacity cDNA Reverse  
24 transcription kit with RNase inhibitors. The reaction was prepared using 500 ug of total RNA in 20  $\mu$ l of total volume  
25 and according to the manufacturer's instructions. Newly synthesized cDNA was diluted 5 fold in DNase-free water.

1 For PCR, 4% of the cDNA which was reverse transcribed from 500 ng of total RNA was used. Quantitative Real Time  
2 PCR (Fast Sybr-Green Master Mix, Applied Biosystems) was performed to determine the relative expression of SOX9  
3 (FW 5'-CGCCATCTTCAAGGCGCTGC-3', RV 5'- CCTGGGATTGCCCCGAGTGC- 3') MEF2C (FW 5'-  
4 ACCTATTGCCACTGGCTCAC-3', RV 5'-ACCCATCAGACCACCTGTGT-3') EPAS1 (HIF-2 $\alpha$ ) (FW 5'-  
5 AGATGGCCACATGATCTTTCTGT-3',RV 5'-CCTGTTAGCTCCACCTGTGTAAGTC-3'), CAIX (FW 5'-  
6 TCGGAGCACACTGTGGAAG-3', RV 5'-AAGGCCTCGTCAACTCTGG-3') COL2A1 (FW 5'-  
7 GGAAGAGTGGAGACTACTGGATTGAC - 3', RV 5'- TCCATGTTGCAGAAAACCTTCA - 3') and housekeeping  
8 gene RPLP0 (FW 5'-CCATTGAAATCCTGAGTGATGTG-3', RV 5'-CTTCGCTGGCTCCCACCTTT-3'). The qPCR  
9 reactions were performed in triplicate using SYBR Green PCR Master Mix (Applied Biosystem) with appropriate  
10 primers for each gene. The standard curve method was used to calculate relative levels for each transcript.

## 11 **Western Blotting**

12 HACs were cultured as monolayers in 20 or 1% oxygen tension for 36–48 h before lysis in radio-immunoprecipitation  
13 assay buffer (150 mM NaCl, 10 mM Tris, pH 7.2, 5 mM EDTA, 1% Triton X-100, 0.1% SDS, 1% deoxycholic acid).  
14 Proteins were detected by Western blotting using a polyclonal anti-SOX9 antibody (1:1000 ,AB5809 Millipore), anti-  
15 HIF-2 $\alpha$  (1:250 , sc-13596,Santa Cruz), anti-MEF2C (1:500 , D80C110,Cell Signalling Technologies.),  $\alpha$ -Tubulin  
16 (1:10000, ab7291, Sigma Aldrich). and ECL reagent (Amersham Biosciences, Buckinghamshire, UK) according to the  
17 manufacturer's instructions.

## 18 **ChIP Assays**

19 MEF2-ChIP was performed using the Imprint chromatin immunoprecipitation kit (Sigma-Aldrich) according to the  
20 manufacturer's instructions with minor modifications.  $5 \times 10^5$  HACs were plated in a 10 cm dish and cross-linked with  
21 final 1% formaldehyde for 10 min at room temperature. Formaldehyde crosslinking was stopped by adding glycine to  
22 a final concentration of 125mM and incubating at room temperature for 5 min. Cells were harvested and lysed to  
23 isolate nuclei in a hypotonic buffer, then re-suspended, lysed in lysis buffer, and sonicated in 1.5 ml tubes with  
24 Bioruptor Diagenode ( $8 \times 30$  s) to yield chromatin size of 100–600 bp. ChIP was performed with 2 $\mu$ g of anti-MEF2  
25 (Santa Cruz sc313x) and anti-rabbit IgG. Co-precipitated DNA was then analyzed by qRT-PCR performed with SYBR  
26 green mix (Applied Biosystems). Primers sequence (FW 5'-CGTTGAGCGCTTACTGTATCT-3'; RV 5'-

1 ACGCCCACTCCCACTATTTT-3’).

## 2 **Statistical Analysis**

3 All the data were analysed using Prism 7 software (GraphPad), and were typically compared by a two-tailed t-test  
4 (Student’s distribution). Results are expressed as mean  $\pm$  S.E.M. Probability (P) values less than 0.05 were considered  
5 to be statistically significant and have been denoted: \*P < 0.05, \*\*P < 0.01, \*\*\*P < 0.001, \*\*\*\*P < 0.0001.

## 1 REFERENCES

2

- 3 1. Bora, F.W., Jr. and G. Miller, *Joint physiology, cartilage metabolism, and the etiology of*  
4 *osteoarthritis*. *Hand Clin*, 1987. **3**(3): p. 325-36.
- 5 2. Pacifici, M., et al., *Syndecan-3: a cell-surface heparan sulfate proteoglycan important for chondrocyte*  
6 *proliferation and function during limb skeletogenesis*. *J Bone Miner Metab*, 2005. **23**(3): p. 191-9.
- 7 3. Sophia Fox, A.J., A. Bedi, and S.A. Rodeo, *The basic science of articular cartilage: structure,*  
8 *composition, and function*. *Sports Health*, 2009. **1**(6): p. 461-8.
- 9 4. Nelson, L., J. Fairclough, and C.W. Archer, *Use of stem cells in the biological repair of articular*  
10 *cartilage*. *Expert Opin Biol Ther*, 2010. **10**(1): p. 43-55.
- 11 5. Lund-Olesen, K., *Oxygen tension in synovial fluids*. *Arthritis Rheum*, 1970. **13**(6): p. 769-76.
- 12 6. Richman, A.I., E.Y. Su, and G. Ho, Jr., *Reciprocal relationship of synovial fluid volume and oxygen*  
13 *tension*. *Arthritis Rheum*, 1981. **24**(5): p. 701-5.
- 14 7. Lafont, J.E., et al., *Hypoxia promotes the differentiated human articular chondrocyte phenotype*  
15 *through SOX9-dependent and -independent pathways*. *Journal of Biological Chemistry*, 2008. **283**(8):  
16 p. 4778-4786.
- 17 8. Lafont, J.E., S. Talma, and C.L. Murphy, *Hypoxia-inducible factor 2 alpha is essential for hypoxic*  
18 *induction of the human articular chondrocyte phenotype*. *Arthritis and Rheumatism*, 2007. **56**(10): p.  
19 3297-3306.
- 20 9. Thoms, B.L., et al., *Hypoxia promotes the production and inhibits the destruction of human articular*  
21 *cartilage*. *Arthritis Rheum*, 2013. **65**(5): p. 1302-12.
- 22 10. Agarwal, P., et al., *The MADS box transcription factor MEF2C regulates melanocyte development and*  
23 *is a direct transcriptional target and partner of SOX10*. *Development*, 2011. **138**(12): p. 2555-65.
- 24 11. Arnold, M.A., et al., *MEF2C transcription factor controls chondrocyte hypertrophy and bone*  
25 *development*. *Dev Cell*, 2007. **12**(3): p. 377-89.
- 26 12. Black, B.L. and E.N. Olson, *Transcriptional control of muscle development by myocyte enhancer*  
27 *factor-2 (MEF2) proteins*. *Annu Rev Cell Dev Biol*, 1998. **14**: p. 167-96.
- 28 13. Gerstein, R.M., *Deciding the decider: Mef2c in hematopoiesis*. *Nature Immunology*, 2009. **10**(3): p.  
29 235-236.
- 30 14. Lin, Q., et al., *Control of mouse cardiac morphogenesis and myogenesis by transcription factor*  
31 *MEF2C*. *Science*, 1997. **276**(5317): p. 1404-7.
- 32 15. Miller, C.T., et al., *mef2ca is required in cranial neural crest to effect Endothelin1 signaling in*  
33 *zebrafish*. *Developmental Biology*, 2007. **308**(1): p. 144-157.
- 34 16. Stehling-Sun, S., et al., *Regulation of lymphoid versus myeloid fate 'choice' by the transcription factor*  
35 *Mef2c*. *Nature Immunology*, 2009. **10**(3): p. 289-296.
- 36 17. Verzi, M.P., et al., *The transcription factor MEF2C is required for craniofacial development*.  
37 *Developmental Cell*, 2007. **12**(4): p. 645-652.
- 38 18. Hattori, T., et al., *SOX9 is a major negative regulator of cartilage vascularization, bone marrow*  
39 *formation and endochondral ossification*. *Development*, 2010. **137**(6): p. 901-11.
- 40 19. Bi, W., et al., *Sox9 is required for cartilage formation*. *Nat Genet*, 1999. **22**(1): p. 85-9.
- 41 20. Foster, J.W., et al., *Campomelic dysplasia and autosomal sex reversal caused by mutations in an SRY-*  
42 *related gene*. *Nature*, 1994. **372**(6506): p. 525-30.
- 43 21. Dy, P., et al., *Sox9 directs hypertrophic maturation and blocks osteoblast differentiation of growth*  
44 *plate chondrocytes*. *Dev Cell*, 2012. **22**(3): p. 597-609.
- 45 22. Dreier, R., *Hypertrophic differentiation of chondrocytes in osteoarthritis: the developmental aspect of*  
46 *degenerative joint disorders*. *Arthritis Res Ther*, 2010. **12**(5): p. 216.
- 47 23. Peacock, J.D., et al., *Reduced sox9 function promotes heart valve calcification phenotypes in vivo*. *Circ*  
48 *Res*, 2010. **106**(4): p. 712-9.
- 49 24. Lockhart, M.M., et al., *Mef2c regulates transcription of the extracellular matrix protein cartilage link*  
50 *protein 1 in the developing murine heart*. *PLoS One*, 2013. **8**(2): p. e57073.
- 51 25. Krishnan, J., et al., *Essential Role of Developmentally Activated Hypoxia-Inducible Factor 1 alpha for*  
52 *Cardiac Morphogenesis and Function*. *Circulation Research*, 2008. **103**(10): p. 1139-1146.

- 1 26. Klinger, P., et al., *Chondromodulin 1 stabilizes the chondrocyte phenotype and inhibits endochondral*  
2 *ossification of porcine cartilage repair tissue*. Arthritis Rheum, 2011. **63**(9): p. 2721-31.  
3 27. Xu, Z., et al., *MEF2C ablation in endothelial cells reduces retinal vessel loss and suppresses*  
4 *pathologic retinal neovascularization in oxygen-induced retinopathy*. Am J Pathol, 2012. **180**(6): p.  
5 2548-60.  
6 28. Yokoi, H., et al., *Expression profiling of zebrafish sox9 mutants reveals that Sox9 is required for*  
7 *retinal differentiation*. Dev Biol, 2009. **329**(1): p. 1-15.

8

9

#### 10 **AUTHOR CONTRIBUTIONS STATEMENTS**

11 SL and CM wrote the main manuscript text and prepared the figures. SL performed all experimental work with  
12 the exception of tissue harvest which CL performed. All authors reviewed the manuscript.

13

#### 14 **COMPETING FINANCIAL INTERESTS**

15 I declare that the authors have no competing interests as defined by Nature Publishing Group, or other interests  
16 that might be perceived to influence the results and/or discussion reported in this paper.



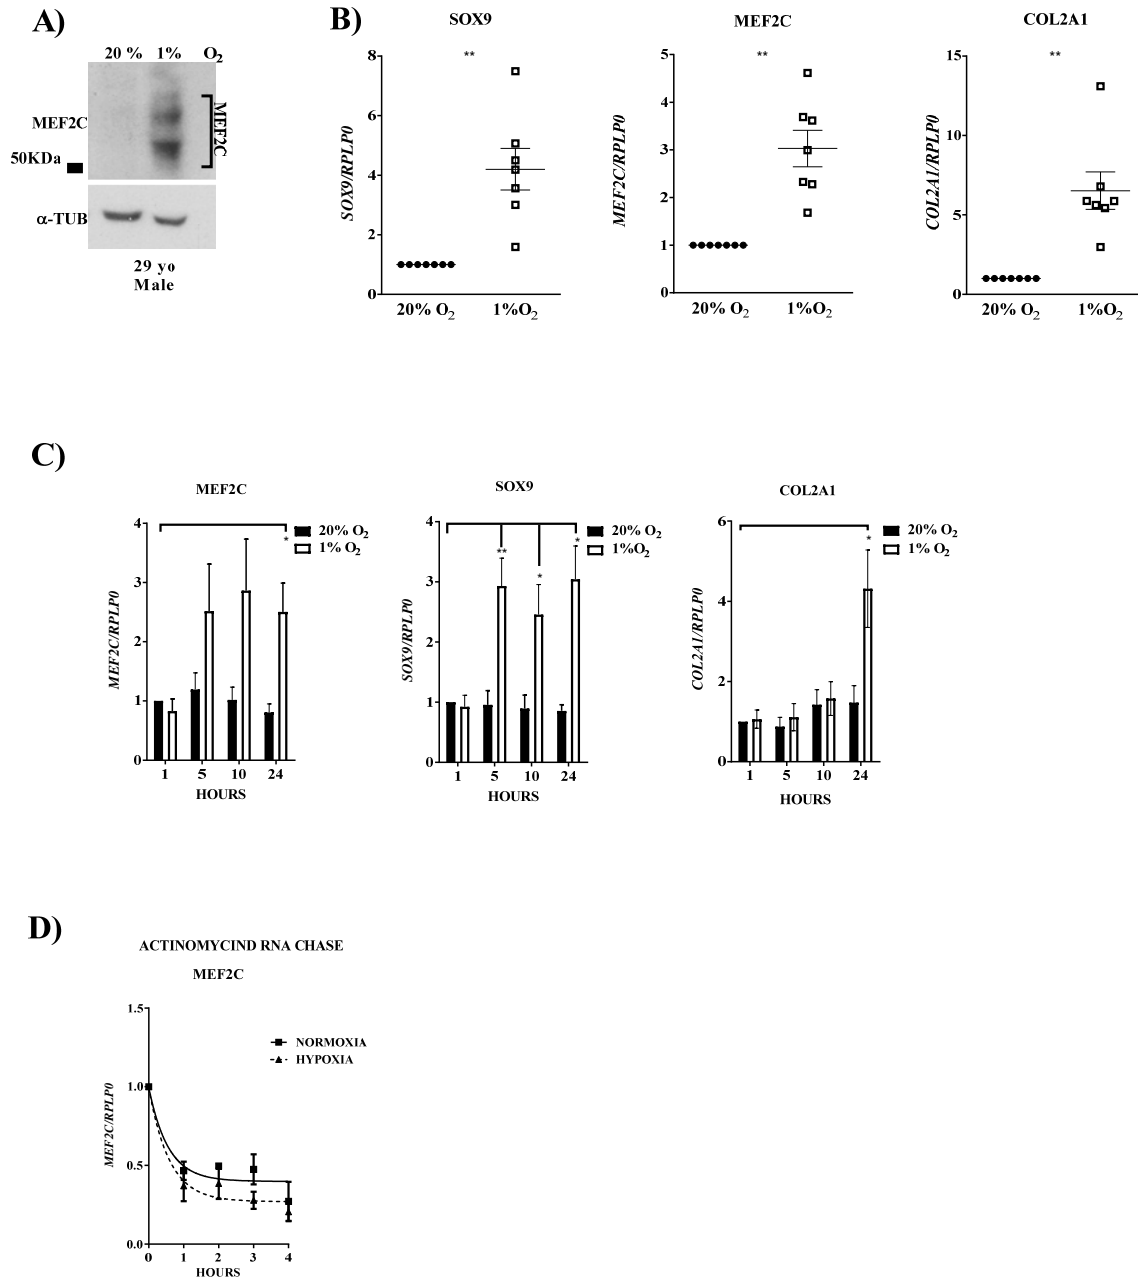

1

2 **FIGURE 1. MEF2C is regulated by hypoxia in human articular chondrocytes.** Western Blot showing an  
 3 increase in MEF2C protein level in human articular chondrocytes (HACs) after 2 days in hypoxia (A); note:  
 4 TUB –  $\alpha$ -tubulin. SOX9, MEF2C and COL2A1 are all induced by hypoxia at the mRNA level following 2  
 5 days of treatment (B, data show the average from 7 independent experiments). HACs (passage 1 or 2  
 6 monolayer cultures) were incubated for 1, 5, 10 and 24 hours in 20% or 1% O<sub>2</sub> and SOX9, MEF2C, COL2A  
 7 were quantified using RT-qPCR and expressed relative to 1h levels in 20% O<sub>2</sub> (C, data show the average from  
 8 4 independent experiments). Hypoxia does not affect MEF2C mRNA stability in HACs (D). HAC monolayer  
 9 cultures were maintained for 1 day in normoxia (20% O<sub>2</sub>) or hypoxia (1% O<sub>2</sub>) and samples were harvested  
 10 after 1, 2, 3 and 4 hours following administration of Actinomycin D (data show the average from 4  
 11 independent experiments).

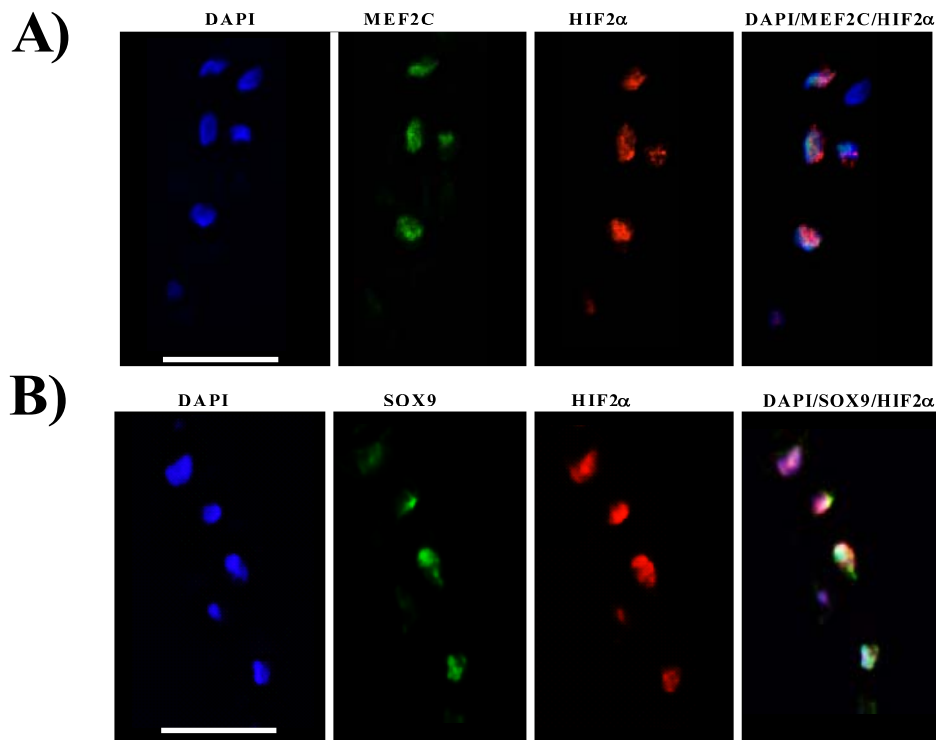

1  
2  
3  
4

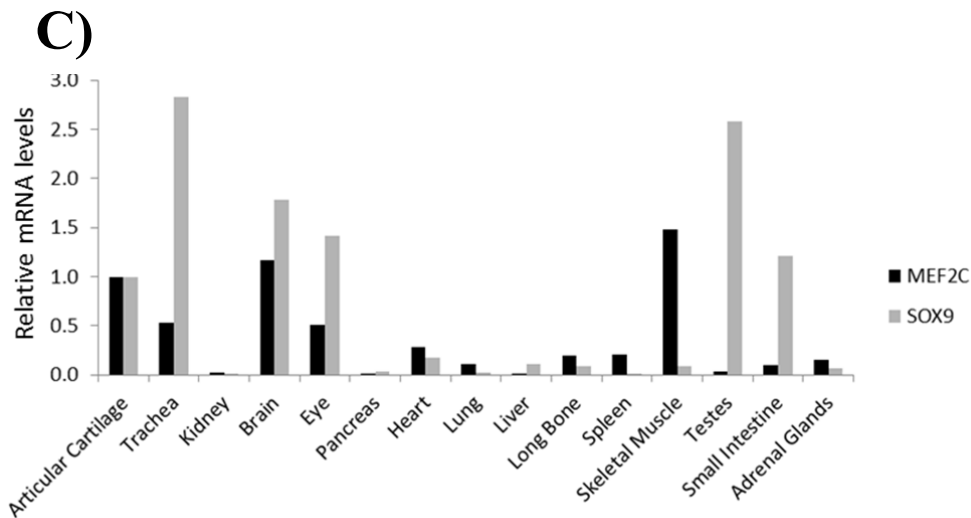

5  
6  
7  
8  
9  
10  
11  
12

**FIGURE 2. MEF2C protein is present in the nucleus of chondrocytes in intact human articular cartilage.** Cryosections of freshly harvested human articular cartilage were stained for MEF2C, HIF-2 $\alpha$  and SOX9 proteins. Nuclear co-localisation of MEF2C and HIF-2 $\alpha$  (A) and of SOX9 and HIF-2 $\alpha$  (B). Mef2c and Sox9 gene expression across 15 adult murine tissues (pooled samples from 6 mice). Messenger RNA levels were normalized to those of 28S and expressed relative to articular cartilage levels. Note:  $\alpha$ -TUB –  $\alpha$ -tubulin.

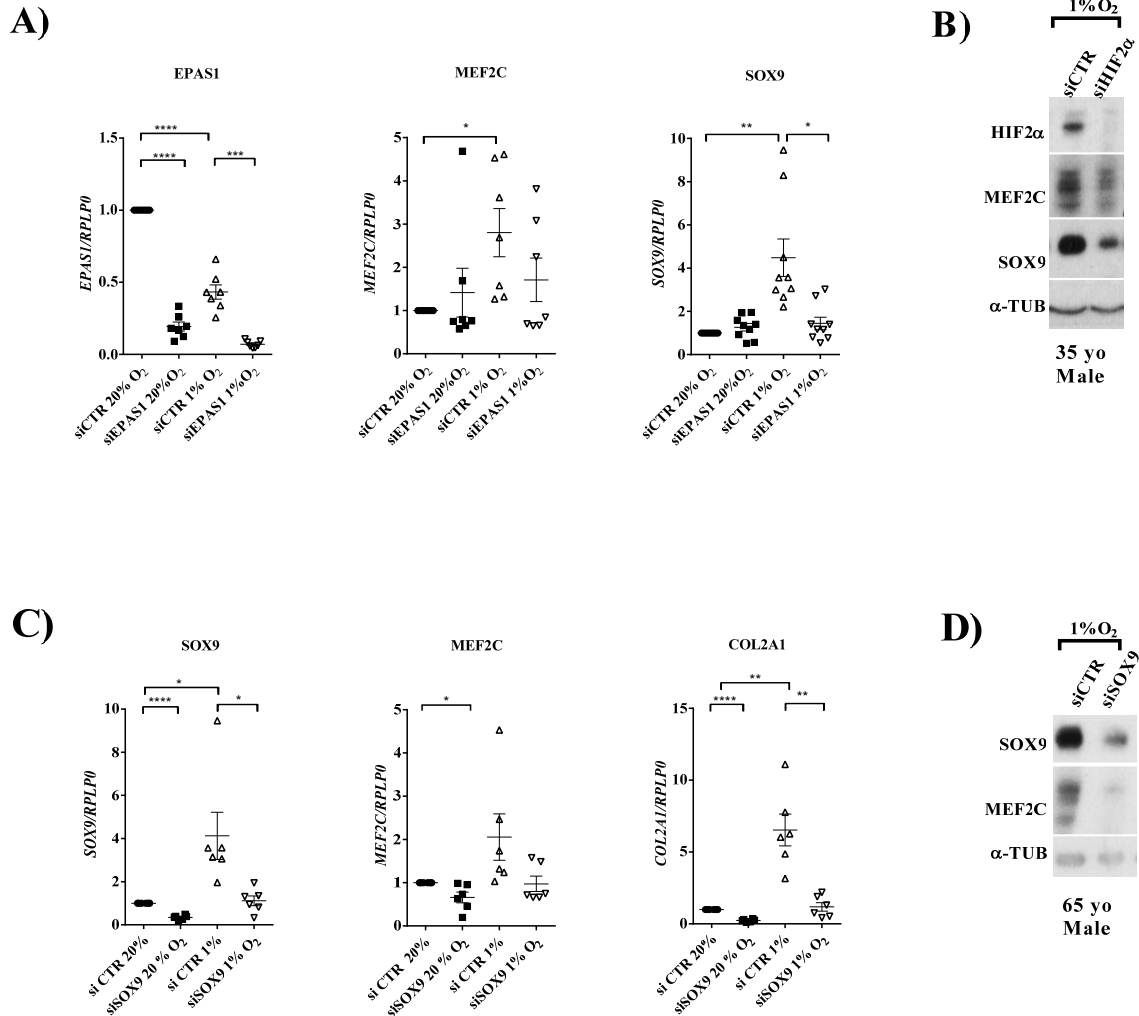

1  
2  
3  
4  
5  
6  
7  
8

**FIGURE 3. MEF2C expression is regulated by HIF-2 $\alpha$  and SOX9 in human articular chondrocytes.** Effect of depletion of HIF-2 $\alpha$  (encoded by EPAS1) in HAC cultures results on MEF2C and SOX9 mRNA (A) and protein (B) levels. Effect of depletion of SOX9 on MEF2C and COL2A1 mRNA levels and MEF2C protein levels (D). (PCR expression data from 7 independent experiments). Note:  $\alpha$ -TUB –  $\alpha$ -tubulin, yo – years old; CTR – control. For display purposes blots have been cropped.

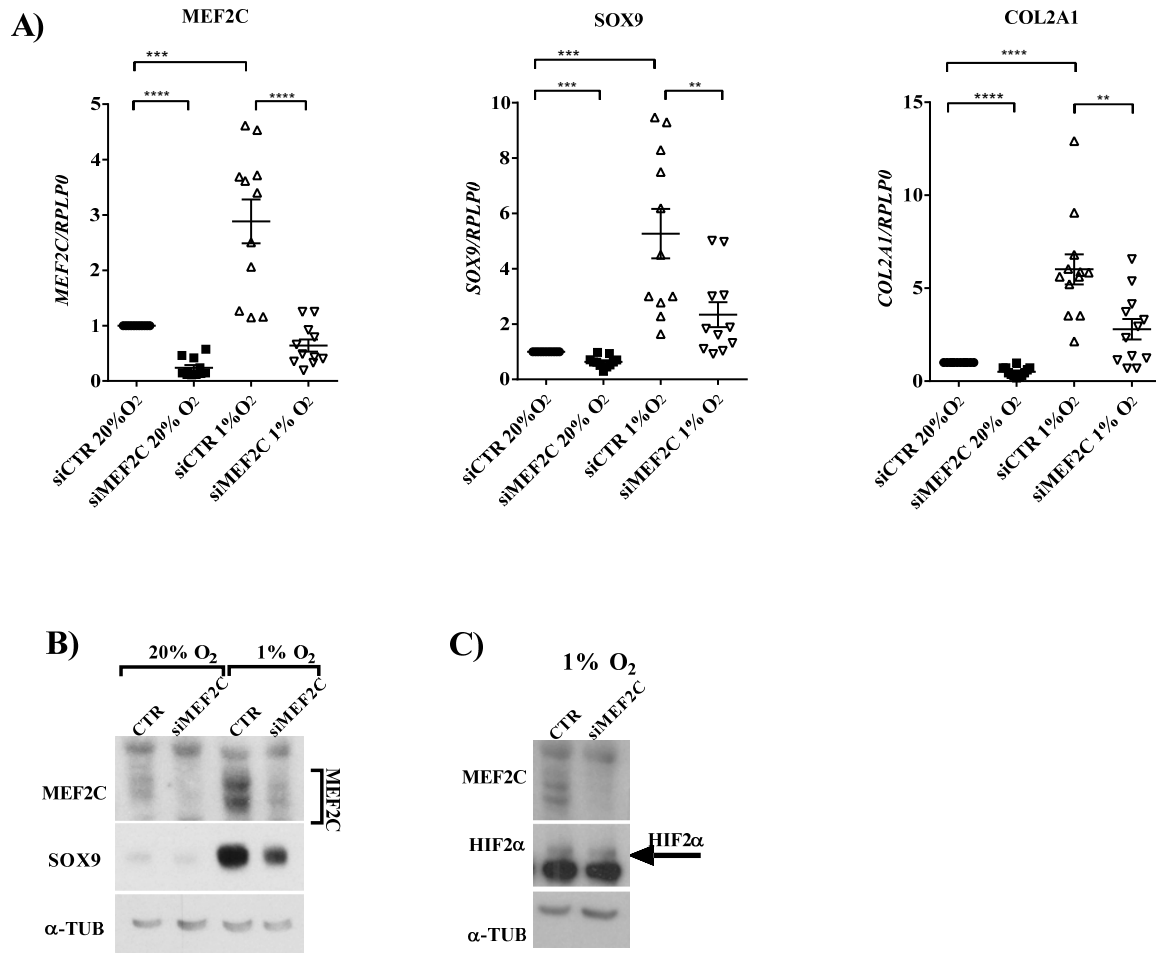

1  
2  
3  
4  
5  
6  
7  
8  
9

**FIGURE 4. Expression of cartilage master regulator SOX9 is strongly dependent on transcription factor MEF2C in human articular chondrocytes.** Following transfection with siMEF2C, HACs were cultured for 2 days in 20% or 1% O<sub>2</sub>. Depletion of MEF2C resulted in a significant decrease in SOX9 gene expression and of SOX9 key target gene, COL2A1 (A). A decrease in SOX9 protein levels was particularly evident in hypoxia (1% O<sub>2</sub>) (B), while HIF-2α levels were unaffected (C) in MEF2C depleted HACs. For display purposes blots have been cropped.

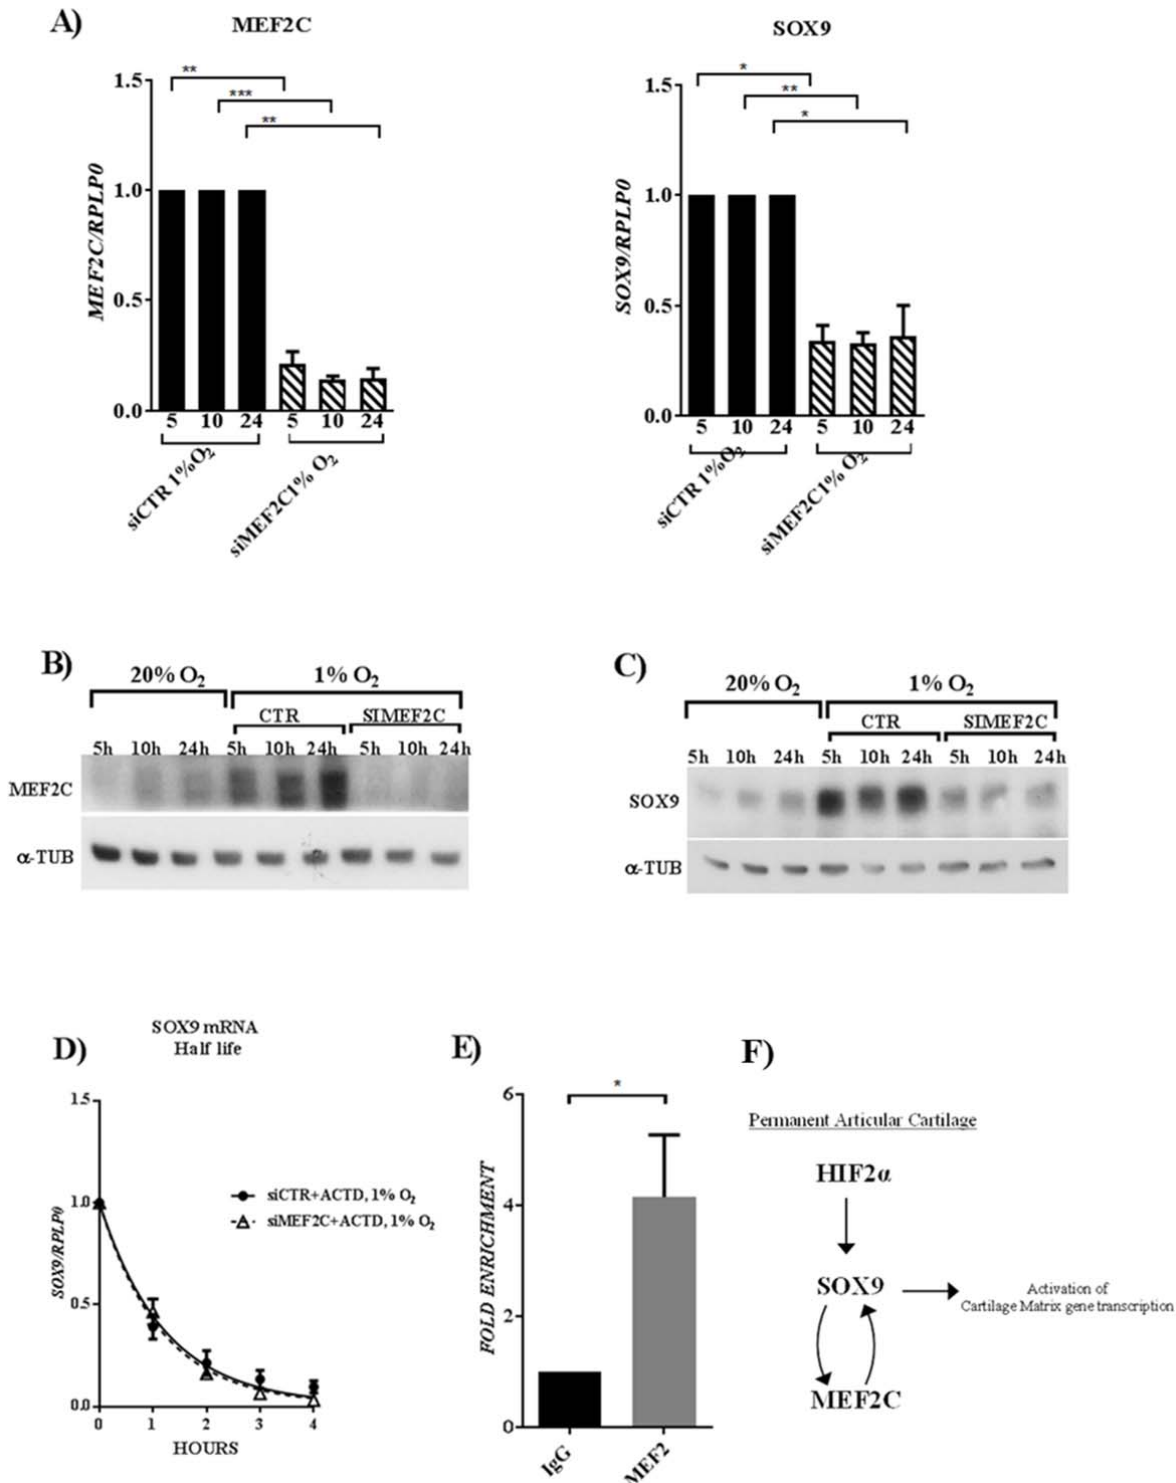

1  
2  
3  
4  
5  
6  
7  
8

**FIGURE 5. MEF2C is a transcriptional activator of SOX9 in human articular chondrocytes and is required for its hypoxic induction.** The silencing of MEF2C abolished the rapid hypoxic induction of SOX9 at mRNA (A) and protein (C) levels (data from 3 independent experiments). MEF2C does not affect SOX9 mRNA stability as revealed by actinomycin D chase experiments (D, data from 4 independent experiments). ChIP assays reveal that MEF2C directly binds to the SOX9 gene at an upstream site (E). Schematic summarising the identified role of transcription factor MEF2C in the permanent articular cartilage in humans (F). For display purposes blots have been cropped.
